# Supplementary material for: High rate performance SnO2based three-dimensional graphene composite electrode for lithium-ion battery applications
Source: Royal Society of Chemistry journal article supplement (doi:10.1039/c6ra28258j), 2017-01-01
Supplement: c6ra28258j1.pdf [file c6ra28258j1.pdf]

Electronic Supplementary Information for

# High Rate Performance SnO<sub>2</sub> based Three-dimension Graphene Composite Electrode for Lithium-ion Battery Applications

Shi-yong Zuo,<sup>a</sup> Zhi-guo Wu,<sup>a,b,\*</sup> Shuan-kui Li,<sup>a</sup> De Yan,<sup>a</sup> Yan-hua Liu,<sup>c</sup> Feng-yi Wang,<sup>a</sup> Ren-fu Zhuo,<sup>a</sup> Bai-song Geng,<sup>a</sup> Jun Wang,<sup>a</sup> Peng-xun Yan<sup>b</sup>

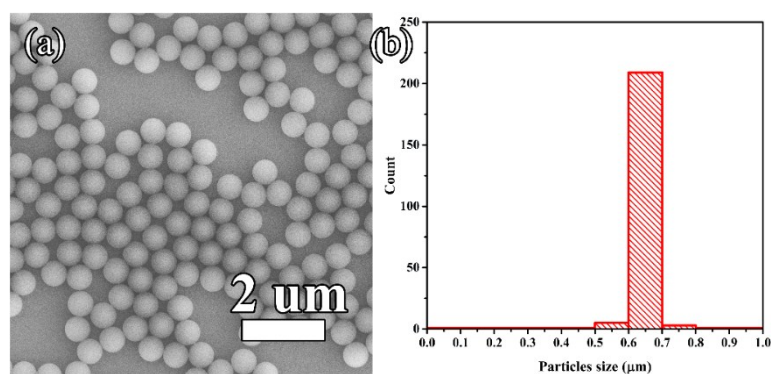

Fig.s1. the SEM image (a) and particles size of PS.

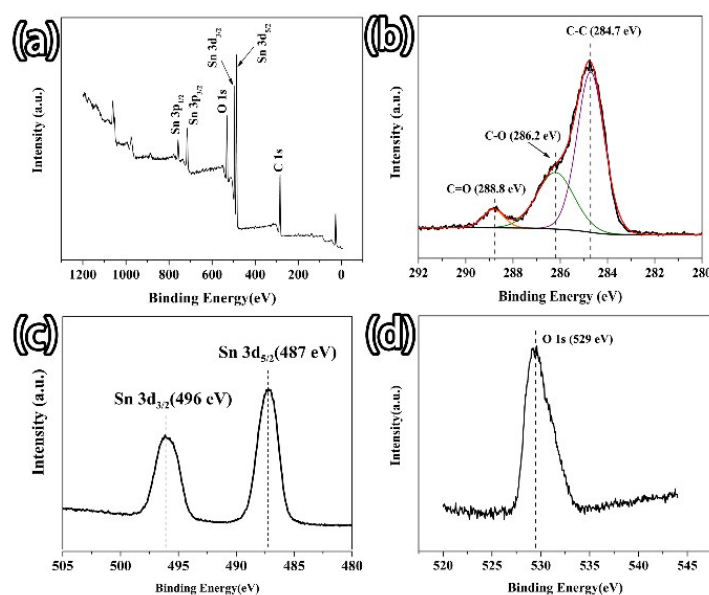

Fig.s2. XPS spectra of sample3: (a) survey; (b) C 1s; (c) Sn 3d and (d) O 1s.

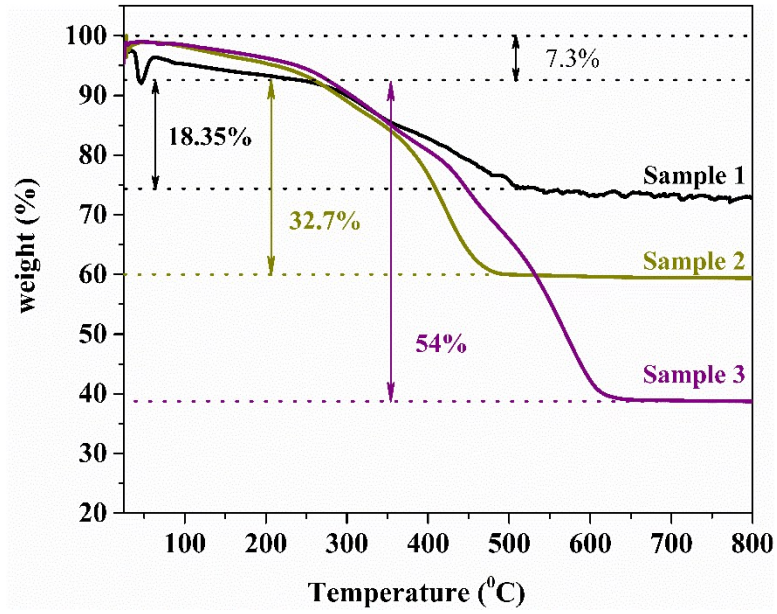

Fig.s3. Thermogravimetric analysis (TGA ) of the three samples.
